# Supplementary material for: Wildfire air pollution hazard during the 21st century
Source: Copernicus journal article supplement (doi:10.5194/acp-17-9223-2017), 2017-07-31
Supplement: Supplementary file 1 [file acp-17-9223-2017-supplement.pdf]

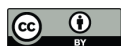

*Supplement of*

## **Wildfire air pollution hazard during the 21st century**

**Wolfgang Knorr et al.**

*Correspondence to:* Wolfgang Knorr ([wolfgang.knorr@nateko.lu.se](mailto:wolfgang.knorr@nateko.lu.se))

The copyright of individual parts of the supplement might differ from the CC BY 3.0 License.

# Supplementary Information

Table S1: Countries/regions used for scaling GFED4.1s wildfire emissions.

| Code | Country name             | World region                                   | grid cells on 1-degree grid | non-crop cells <sup>1</sup> | Code   | Country name                          | World region                       | grid cells on 1-degree grid | non-crop cells | longitude range  | latitude range |
|------|--------------------------|------------------------------------------------|-----------------------------|-----------------------------|--------|---------------------------------------|------------------------------------|-----------------------------|----------------|------------------|----------------|
| AGO  | Angola                   |                                                | 100                         | 100                         | ARM    | Armenia                               |                                    | 4                           | 4              |                  |                |
| BEN  | Benin                    |                                                | 10                          | 6                           | AZE    | Azerbaijan                            |                                    | 7                           | 6              |                  |                |
| BWA  | Botswana                 |                                                | 46                          | 46                          | GEO    | Georgia                               |                                    | 6                           | 6              |                  |                |
| BFA  | Burkina Faso             |                                                | 23                          | 21                          | KAZ    | Kazakhstan                            |                                    | 213                         | 206            |                  |                |
| BDI  | Burundi                  |                                                | 3                           | 3                           | KGZ    | Kyrgyzstan                            |                                    | 16                          | 16             |                  |                |
| CMR  | Cameroon                 |                                                | 37                          | 35                          | TJK    | Tajikistan                            |                                    | 8                           | 8              |                  |                |
| CAF  | Central African Republic |                                                | 49                          | 46                          | TKM    | Turkmenistan                          |                                    | 35                          | 35             |                  |                |
| TCO  | Chad                     |                                                | 100                         | 100                         | UZB    | Uzbekistan                            |                                    | 35                          | 32             |                  |                |
| COG  | Congo                    |                                                | 24                          | 24                          | BLR    | Belarus                               | Eastern Europe,                    | 16                          | 14             |                  |                |
| ZAR  | Congo, Dem. Republic     |                                                | 176                         | 176                         | BGR    | Bulgaria                              | Russia and Central Asia (ERCA)     | 10                          | 8              |                  |                |
| CIV  | Cote d'Ivoire            |                                                | 25                          | 24                          | LLI    | Latvia and Lithuania                  |                                    | 10                          | 5              |                  |                |
| ERI  | Eritrea                  |                                                | 12                          | 12                          | ROM    | Romania                               |                                    | 19                          | 10             |                  |                |
| ETH  | Ethiopia                 |                                                | 90                          | 89                          | RUS-SW |                                       |                                    | 78                          | 32             | W of 60°E        | S of 52°N      |
| GAB  | Gabon                    |                                                | 20                          | 20                          | RUS-NW |                                       |                                    | 212                         | 150            | W of 55°E        | N of 52°N      |
| GHA  | Ghana                    |                                                | 18                          | 13                          | RUS-C  | Russian Federation                    |                                    | 553                         | 506            | not in other RUS |                |
| GIN  | Guinea                   |                                                | 20                          | 20                          | RUS-SE |                                       |                                    | 232                         | 232            | E of 110°E       | S of 60°N      |
| GNB  | Guinea-Bissau            |                                                | 1                           | 1                           | RUS-NE |                                       |                                    | 327                         | 327            | E of 110°E       | N of 60°N      |
| KEN  | Kenya                    | Sub-Saharan Africa (SSA)                       | 41                          | 40                          | UKR    | Ukraine                               |                                    | 47                          | 5              |                  |                |
| LSO  | Lesotho                  |                                                | 1                           | 1                           | YUA    | Serbia, Montenegro, Bosnia, Macedonia |                                    | 13                          | 11             |                  |                |
| LBR  | Liberia                  |                                                | 5                           | 5                           | CHN-W  |                                       |                                    | 348                         | 342            | W of 105°E       |                |
| MDG  | Madagascar               |                                                | 43                          | 43                          | CHN-E  | China                                 | Developing East Asia (DEAS)        | 283                         | 211            | E of 105°E       | S of 43°N      |
| MWI  | Malawi                   |                                                | 10                          | 10                          | CHN-N  |                                       |                                    | 122                         | 103            |                  | N of 43°N      |
| MLI  | Mali                     |                                                | 106                         | 106                         | PRK    | North Korea                           |                                    | 10                          | 8              |                  |                |
| MRT  | Mauritania               |                                                | 80                          | 80                          | MNG    | Mongolia                              |                                    | 131                         | 131            |                  |                |
| MOZ  | Mozambique               |                                                | 61                          | 60                          | BTN    | Bhutan                                |                                    | 4                           | 2              |                  |                |
| NAM  | Namibia                  |                                                | 66                          | 66                          | KHM    | Cambodia                              |                                    | 14                          | 13             |                  |                |
| NER  | Niger                    |                                                | 94                          | 80                          | IND    | India                                 |                                    | 256                         | 50             |                  |                |
| NGA  | Nigeria                  |                                                | 74                          | 40                          | IDN    | Indonesia                             |                                    | 125                         | 116            |                  |                |
| SEN  | Senegal                  |                                                | 17                          | 16                          | LAO    | Laos                                  |                                    | 18                          | 18             |                  |                |
| SLE  | Sierra Leone             |                                                | 5                           | 5                           | MYS    | Malaysia                              | South and South-East Asia (SSEA)   | 23                          | 23             |                  |                |
| SOM  | Somalia                  |                                                | 55                          | 55                          | MMR    | Myanmar                               |                                    | 44                          | 36             |                  |                |
| ZAF  | South Africa             |                                                | 99                          | 98                          | NPL    | Nepal                                 |                                    | 12                          | 8              |                  |                |
| SDN  | Sudan                    |                                                | 207                         | 199                         | PAK    | Pakistan                              |                                    | 58                          | 44             |                  |                |
| TGO  | Togo                     |                                                | 2                           | 1                           | PHL    | Philippines                           |                                    | 16                          | 14             |                  |                |
| UGA  | Uganda                   |                                                | 16                          | 13                          | LKA    | Sri Lanka                             |                                    | 4                           | 4              |                  |                |
| TZA  | Tanzania                 |                                                | 73                          | 72                          | THA    | Thailand                              |                                    | 42                          | 30             |                  |                |
| ZMB  | Zambia                   |                                                | 63                          | 63                          | VNM    | Viet Nam                              |                                    | 27                          | 22             |                  |                |
| ZWE  | Zimbabwe                 |                                                | 30                          | 30                          | PNG    | Papua New Guinea                      |                                    | 31                          | 31             |                  |                |
| DZA  | Algeria                  |                                                | 189                         | 184                         | AUS-SW |                                       |                                    | 18                          | 16             | W of 120°E       | S of 30°S      |
| EGY  | Egypt                    |                                                | 77                          | 76                          | AUS-E  | Australia                             | Australia and New Zealand (AUN)    | 200                         | 178            | E of 140°E       | S of 18°S      |
| LYB  | Libya                    |                                                | 131                         | 131                         | AUS-C  |                                       |                                    | 317                         | 316            | not in other AUS |                |
| MAR  | Morocco                  |                                                | 56                          | 49                          | AUS-N  |                                       |                                    | 76                          | 76             |                  | N of 18°S      |
| TUN  | Tunisia                  | Developing Middle East and North Africa (DMNA) | 14                          | 11                          | NZL    | New Zealand                           |                                    | 22                          | 22             |                  |                |
| AFG  | Afghanistan              |                                                | 53                          | 52                          | CAN-W  |                                       |                                    | 385                         | 341            | W of 100°W       |                |
| IRN  | Iran                     |                                                | 134                         | 129                         | CAN-C  | Canada                                |                                    | 192                         | 185            | 100...80°W       |                |
| IRQ  | Iraq                     |                                                | 37                          | 31                          | CAN-E  |                                       |                                    | 176                         | 176            | E of 80°W        |                |
| JOR  | Jordan                   |                                                | 6                           | 6                           | USA-W  | United States of America              | North America (NOA)                | 314                         | 294            | W of 100°W       |                |
| SAU  | Saudi Arabia             |                                                | 154                         | 154                         | USA-E  |                                       |                                    | 372                         | 222            | E of 100°W       |                |
| SYR  | Syria                    |                                                | 15                          | 9                           | ALK    |                                       |                                    | 116                         | 116            |                  | N of 50°N      |
| TUR  | Turkey                   |                                                | 57                          | 44                          | CRI    | Costa Rica                            |                                    | 3                           | 3              |                  |                |
| YEM  | Yemen                    |                                                | 31                          | 31                          | CUB    | Cuba                                  |                                    | 7                           | 5              |                  |                |
| AUT  | Austria                  |                                                | 7                           | 7                           | DOM    | Dominican Republic                    |                                    | 4                           | 4              |                  |                |
| BNL  | Benelux                  |                                                | 5                           | 3                           | GTM    | Guatemala                             |                                    | 15                          | 15             |                  |                |
| CRS  | Croatia and Slovenia     |                                                | 3                           | 2                           | HTI    | Haiti                                 |                                    | 2                           | 2              |                  |                |
| CZE  | Czech Republic           |                                                | 5                           | 3                           | HND    | Honduras                              |                                    | 9                           | 9              |                  |                |
| DNK  | Denmark                  |                                                | 6                           | 3                           | MEX-W  | Mexico                                |                                    | 120                         | 115            | W of 95°W        |                |
| EST  | Estonia                  |                                                | 4                           | 4                           | MEX-SE |                                       |                                    | 19                          | 19             | E of 95°W        |                |
| FIN  | Finland                  |                                                | 28                          | 27                          | NIC    | Nicaragua                             |                                    | 8                           | 8              |                  |                |
| FRA  | France                   |                                                | 41                          | 24                          | PAN    | Panama                                |                                    | 6                           | 6              |                  |                |
| DEU  | Germany                  |                                                | 32                          | 29                          | ARG    | Argentina                             | Latina America and Caribbean (LAC) | 230                         | 207            |                  |                |
| GRC  | Greece                   | High-income Europe (HEUR)                      | 10                          | 9                           | BOL    | Bolivia                               |                                    | 88                          | 88             |                  |                |
| HUN  | Hungary                  |                                                | 7                           | 2                           | BRA-W  |                                       |                                    | 197                         | 192            | W of 49°W        | S of 5°S       |
| ISL  | Iceland                  |                                                | 7                           | 7                           | BRA-E  | Brazil                                |                                    | 316                         | 294            | E of 49°W        |                |
| IRL  | Ireland                  |                                                | 5                           | 4                           | BRA-N  |                                       |                                    | 161                         | 161            |                  | N of 5°S       |
| ITA  | Italy                    |                                                | 23                          | 11                          | CHL    | Chile                                 |                                    | 61                          | 60             |                  |                |
| NOR  | Norway                   |                                                | 31                          | 31                          | COL    | Colombia                              |                                    | 88                          | 88             |                  |                |
| POL  | Poland                   |                                                | 25                          | 11                          | ECU    | Ecuador                               |                                    | 19                          | 19             |                  |                |
| PRT  | Portugal                 |                                                | 6                           | 5                           | GUF    | French Guiana                         |                                    | 6                           | 6              |                  |                |
| SVK  | Slovakia                 |                                                | 6                           | 2                           | GUY    | Guyana                                |                                    | 15                          | 15             |                  |                |
| ESP  | Spain                    |                                                | 40                          | 24                          | PRY    | Paraguay                              |                                    | 28                          | 28             |                  |                |
| SWE  | Sweden                   |                                                | 39                          | 39                          | PER    | Peru                                  |                                    | 100                         | 100            |                  |                |
| CHE  | Switzerland              |                                                | 2                           | 2                           | SUR    | Suriname                              |                                    | 11                          | 11             |                  |                |
| GBR  | United Kingdom           |                                                | 19                          | 13                          | URY    | Uruguay                               |                                    | 15                          | 15             |                  |                |
|      |                          |                                                |                             |                             | VEN    | Venezuela                             |                                    | 73                          | 73             |                  |                |
|      |                          |                                                |                             |                             | ISR    | Israel                                |                                    | 4                           | 4              |                  |                |
|      |                          |                                                |                             |                             | JPN    | Japan                                 |                                    | 28                          | 28             |                  |                |
|      |                          |                                                |                             |                             | KOR    | South Korea                           |                                    | 6                           | 6              |                  |                |
|      |                          |                                                |                             |                             | OMN    | Oman                                  |                                    | 26                          | 26             |                  |                |
|      |                          |                                                |                             |                             | ARE    | United Arab Emirates                  |                                    | 8                           | 8              |                  |                |
|      |                          |                                                |                             |                             | MDA    | Republic of Moldova <sup>2</sup>      |                                    | 4                           | 0              |                  |                |
|      |                          |                                                |                             |                             | BGD    | Bangladesh <sup>2</sup>               |                                    | 10                          | 1              |                  |                |
|      |                          |                                                |                             |                             | GRL    | Greenland <sup>3</sup>                |                                    | 31                          | 31             |                  |                |

<sup>1</sup>Cells with less than 50% cropland fraction in past or future scenarios

<sup>2</sup>Constant emissions assumed because dominated by croplands

<sup>3</sup>Constant emissions assumed because zero current wildfire emissions in some simulations

4     *Table S2: Current PM<sub>2.5</sub> Emissions [Gg/yr] by world region from various sources*

| Region | Wildfire | Deforestation | Peat Fire | Anthropogenic |
|--------|----------|---------------|-----------|---------------|
| SSA    | 14,973   | 538           | 0         | 5,864         |
| LAC    | 3,138    | 1,886         | 0         | 2,534         |
| ERCA   | 2,832    | 0             | 18        | 2,490         |
| SSEA   | 1,593    | 1,499         | 598       | 10,392        |
| AUN    | 1,536    | 22            | 0         | 186           |
| NOA    | 1,349    | 0             | 30        | 1,462         |
| DEAS   | 364      | 17            | 0         | 13,324        |
| HEUR   | 31       | 0             | 0         | 1,630         |
| DMNA   | 7        | 0             | 0         | 1,561         |
| Global | 25,842   | 3,968         | 646       | 40,370        |

5     *SSA: Sub-Saharan Africa, LAC: Latin America & Caribbean, ERCA: Eastern Europe, Russia &*  
6     *Central Asia, SSEA: South & Southeast Asia, AUN: Australia & New Zealand, NOA: North*  
7     *America, DEAS: Developing East Asia, HEUR: High-income Europe, DMNA: Developing*  
8     *Middle-East & North Africa.*

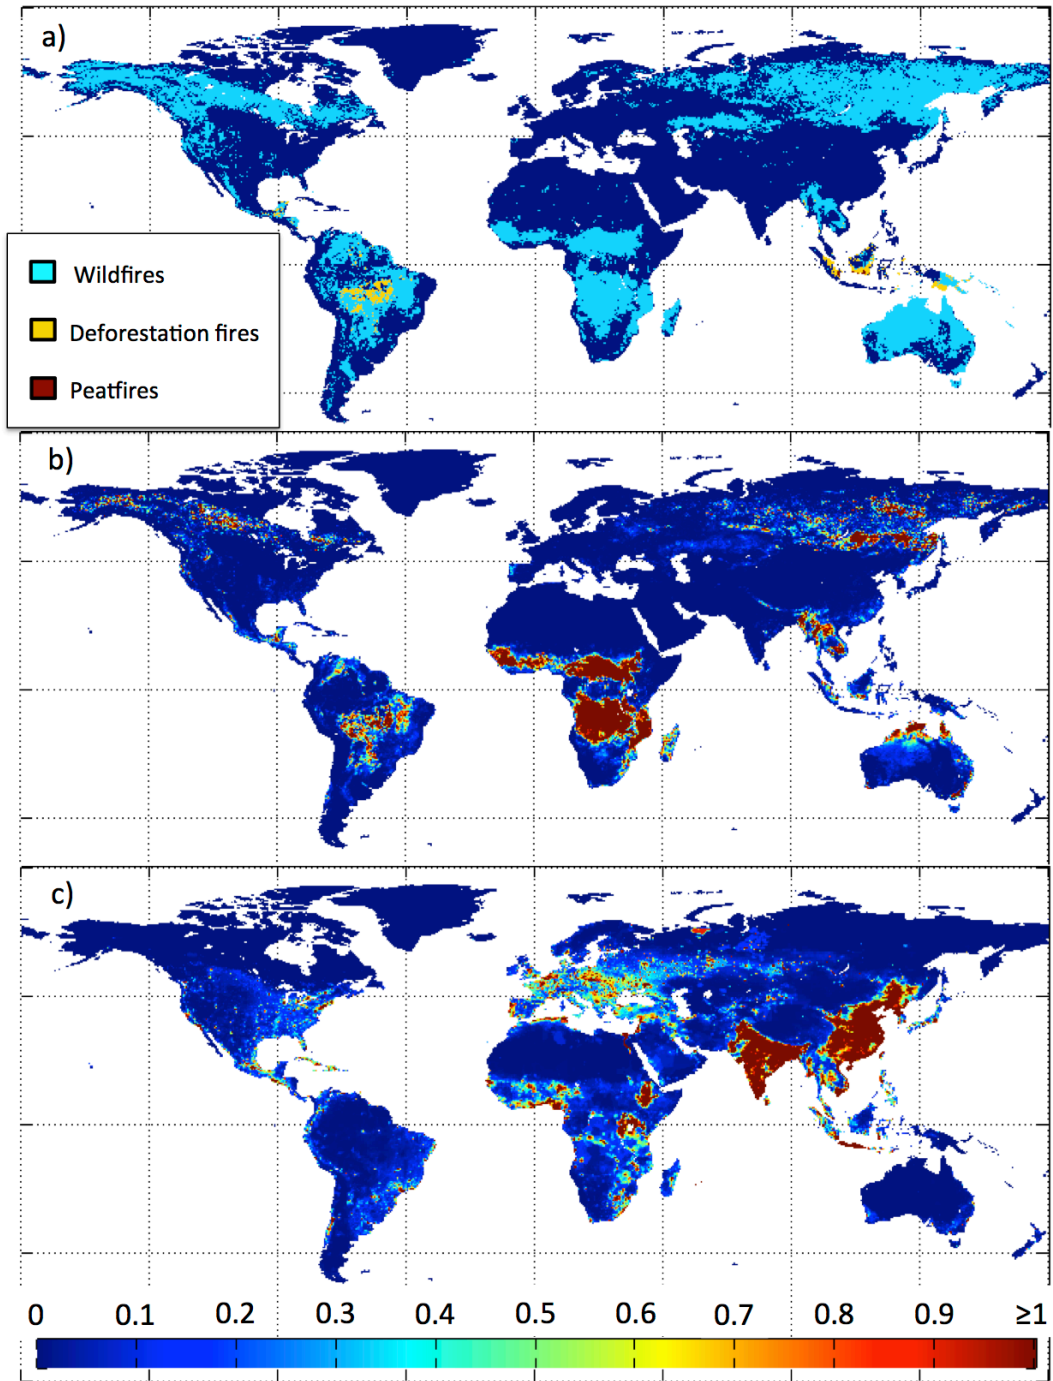

9

10 *Figure S1: a) Largest current source of PM<sub>2.5</sub> emissions (dark blue areas: either*  
 11 *emissions are zero, or anthropogenic emissions are the largest source); b) current*  
 12 *wildfire and c) anthropogenic emissions in g PM<sub>2.5</sub> m<sup>-2</sup> yr<sup>-1</sup>. Average annual PM<sub>2.5</sub>*  
 13 *emissions 1997 to 2014 are from GFED4.1s, or ECLIPSE GAINS 4a for 2010, CLE*  
 14 *scenario (anthropogenic).*  
 15

16

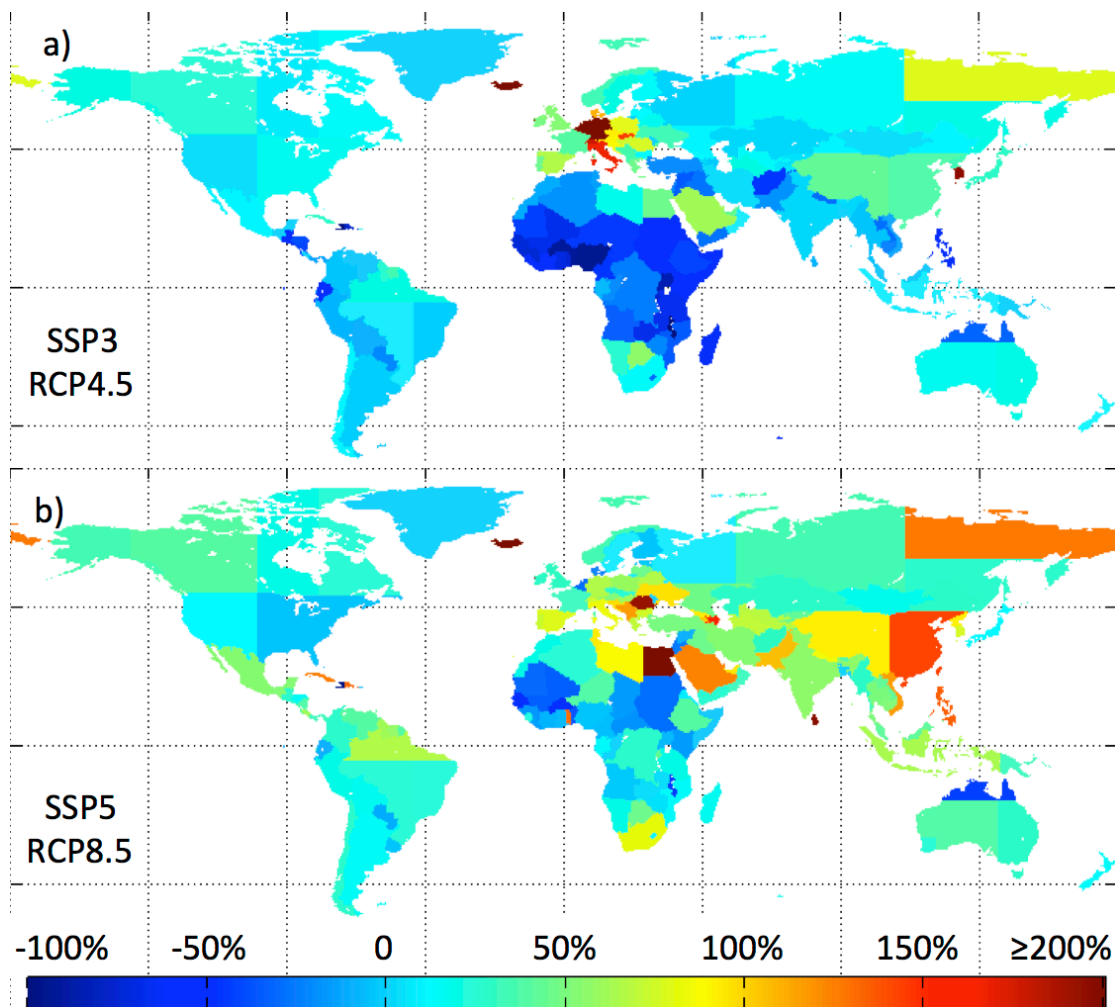

17

18

19

20

21

22

*Figure S2: Relative change in annual PM<sub>2.5</sub> emissions from current (1997-2014 mean) to 2090 (2080 to 2100 mean) by country/region. a) SSP3 globally high population growth (high-income countries: low population growth) with slow urbanisation and RCP4.5 climate scenario, b) SSP5 globally low population growth (high-income countries: high population growth) with slow urbanisation, RCP8.5 climate scenario.*

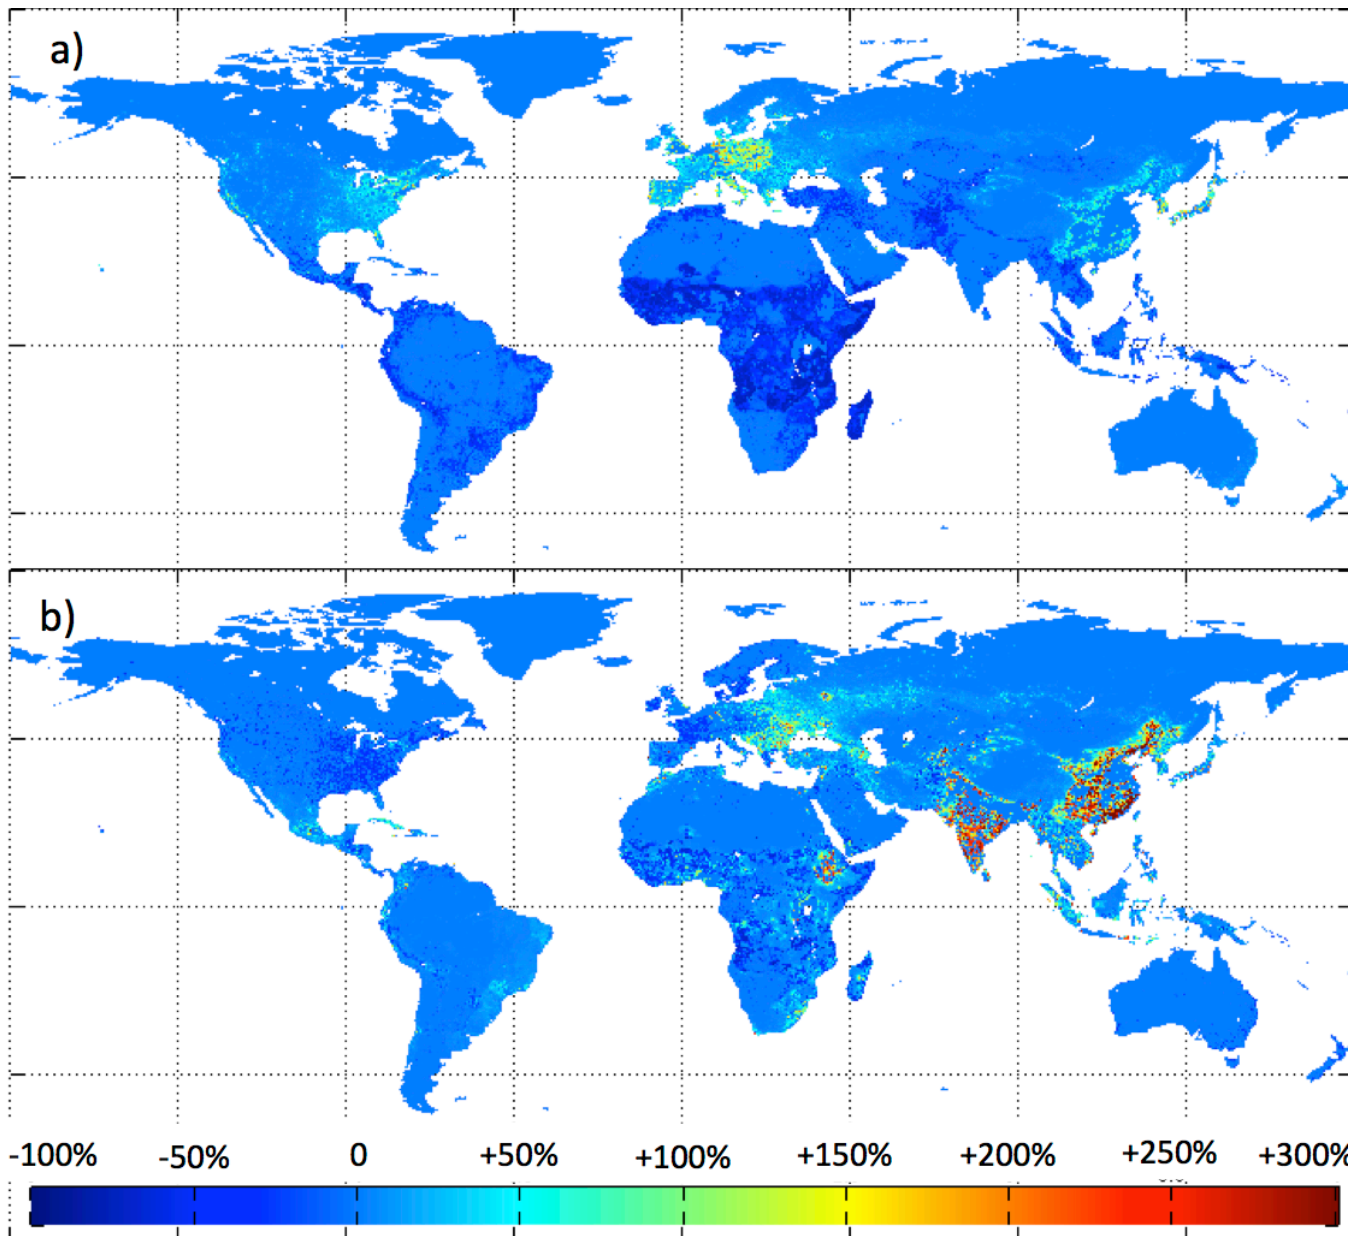

23

24 *Figure S3: Relative change in wildfire emissions due to changes in population density only, between*  
 25 *2010 and 2090, according to Equ. 2. a) SSP3, b) SSP5 demographic scenario.*

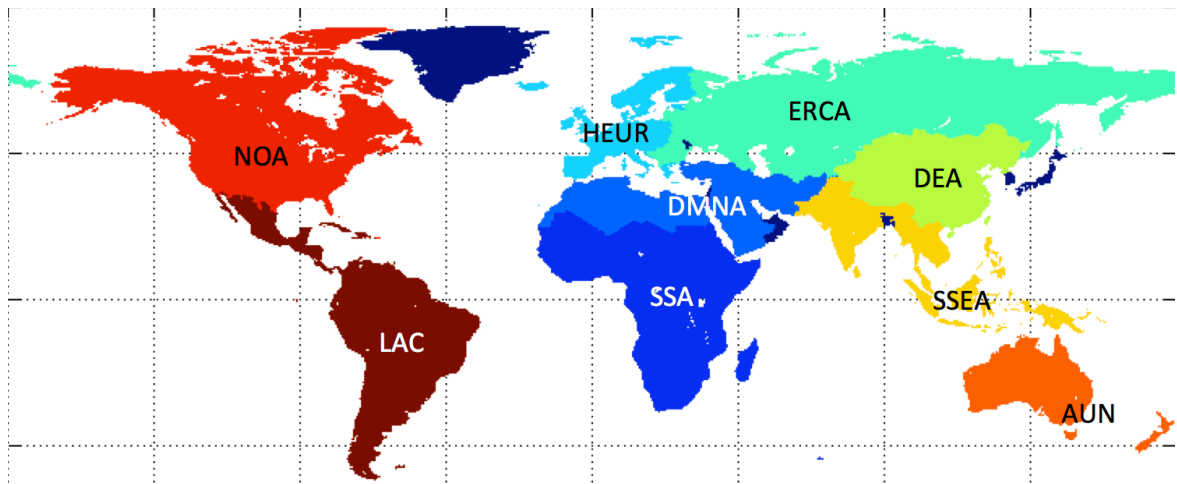

26

27 *Figure S4: World regions used in the analysis. Dark blue: not included.*



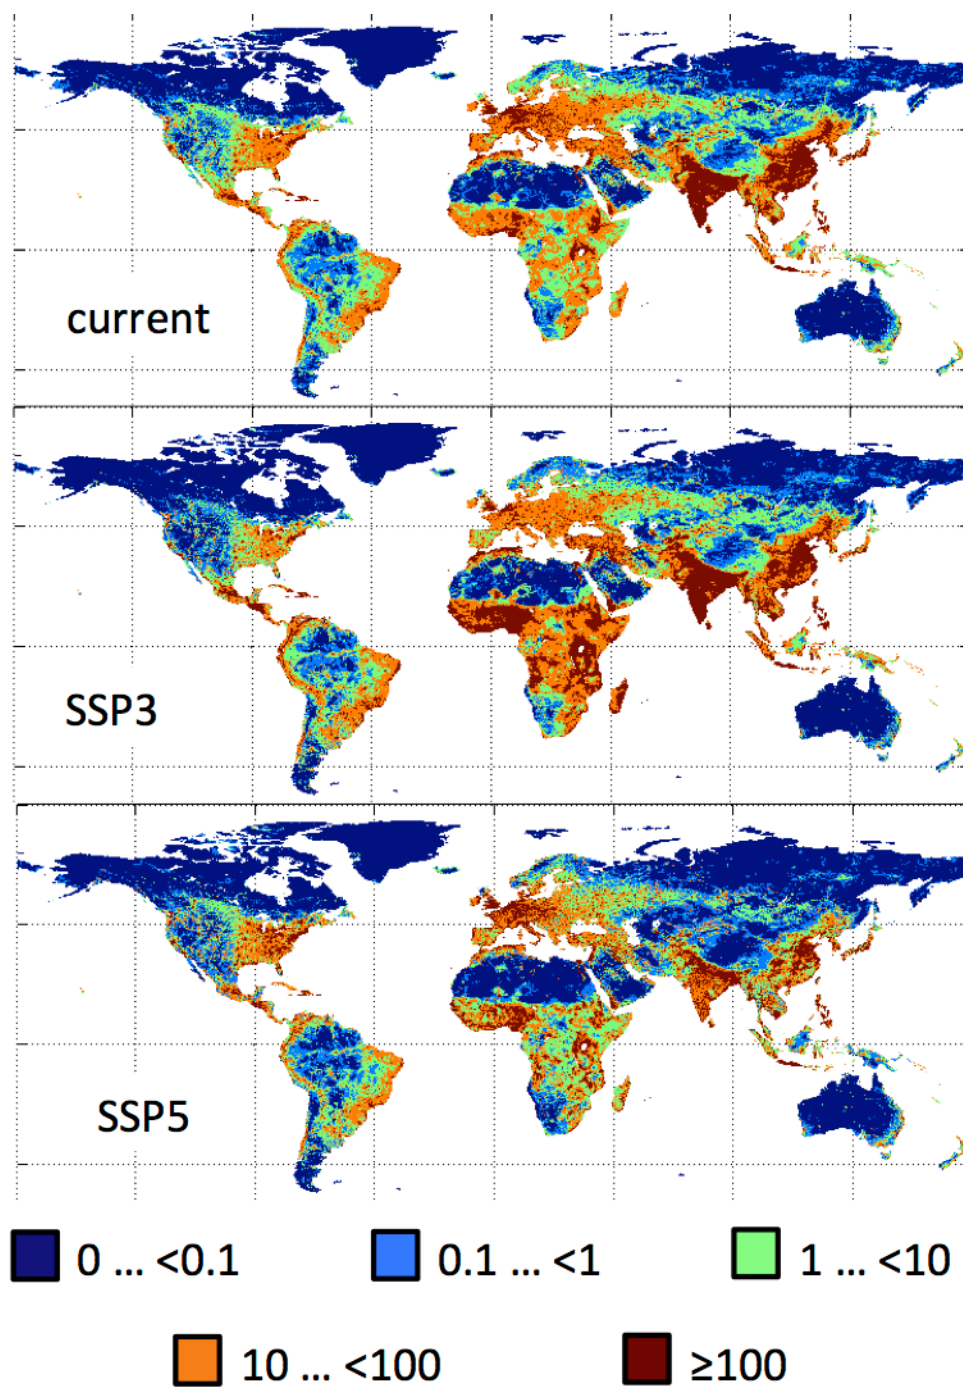

28

29 *Figure S4: Population density categories for current (2010) and future (2090) conditions for the SSP3*  
 30 *and SSP3 demographic scenarios.*

31
